# Supplementary material for: Short hydrophobic loop motifs in BRICHOS domains determine chaperone activity against amorphous protein aggregation but not against amyloid formation
Source: PubMed Central journal article supplement (PMC10167226; doi:10.1038/s42003-023-04883-2), 2023-05-08
Supplement: 42003_2023_4883_MOESM1_ESM.pdf [file 42003_2023_4883_MOESM1_ESM.pdf]

1 **Supplementary Information**

2

3 **Short hydrophobic loop motifs in BRICHOS domains determine chaperone activity**  
4 **against amorphous protein aggregation but not against amyloid formation**

5

6 Gefei Chen<sup>1,#,\*</sup>, Axel Leppert<sup>1,4,#</sup>, Helen Poska<sup>1,2</sup>, Harriet E. Nilsson<sup>3,†</sup>, Carlos Piedrafita  
7 Alvira<sup>1</sup>, Xueying Zhong<sup>3</sup>, Philip Koeck<sup>3</sup>, Caroline Jegerschöld<sup>3</sup>, Axel Abelein<sup>1</sup>, Hans Hebert<sup>3</sup>,  
8 Jan Johansson<sup>1,\*</sup>

9

10 <sup>1</sup>Department of Biosciences and Nutrition, Karolinska Institutet, 141 83 Huddinge, Sweden.

11 <sup>2</sup>School of Natural Sciences and Health, Tallinn University, Tallinn, Estonia.

12 <sup>3</sup>School of Engineering Sciences in Chemistry, Biotechnology and Health, Department of  
13 Biomedical Engineering and Health Systems, KTH Royal Institute of Technology, 141 52  
14 Huddinge, Sweden.

15 <sup>4</sup>Present address Department of Microbiology, Tumour and Cell Biology, Karolinska Institutet,  
16 171 65 Solna, Sweden.

17

18 #These authors contributed equally

19 †Deceased August 29, 2019

20 \*Corresponding authors: gefei.chen@ki.se; janne.johansson@ki.se.

21

22

23

24

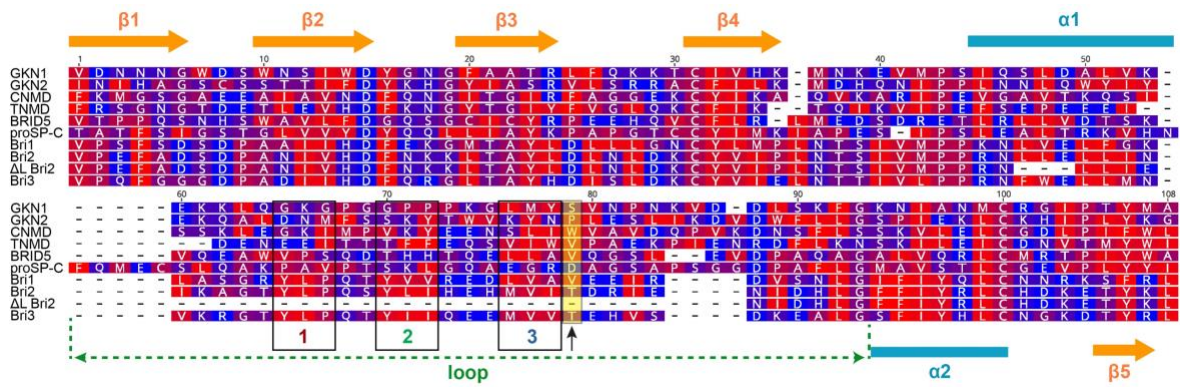

25

26 **Supplementary Fig. 1 | Amino acid sequence alignment of human BRICHOS domains.**

27 Amino acid sequences of human BRICHOS domains aligned using ClustalW embedded in  
 28 Geneious. Residues are color-coded from blue to red according to increasing hydrophobicity.

29 Gaps have been inserted in order to optimise residue identities. The motifs 1–3 are boxed and  
 30 color coded and T206 position in Bri2 BRICHOS is labeled with a black arrow and shaded.

31 The secondary structure elements in proSP-C BRICHOS (PDB accession number: 2yad) are  
 32 shown with arrows and bars. The full loop region is indicated by the dashed green line. The  
 33 BRICHOS sequences shown are the following: gastrokine 1 (GKN1) (pos. 65–164, GenBank

34 accession no. AAQ89409); GKN2 (pos. 51–151, GenBank accession no. AAQ89027);

35 chondromodulin (CNMD) (pos. 101–201, GenBank accession no. NP\_001011705);

36 tenomodulin (TNMD) (pos. 90–186, GenBank accession no. EAX02808); BRICHOS domain

37 containing 5 (BRID5) (pos. 95–193, GenBank accession no. AAT09004); proSP-C (pos. 91–

38 197, GenBank accession no. NP\_003009); Bri1 (pos. 130–227, GenBank accession no.

39 BAD97047); Bri2 (pos. 134–231, GenBank accession no. NP\_068839); ΔL Bri2 BRICHOS

40 (pos. 134–204, GenBank accession no. XP\_013216182). Bri3 (pos. 133–230, GenBank

41 accession no. AAH02424).

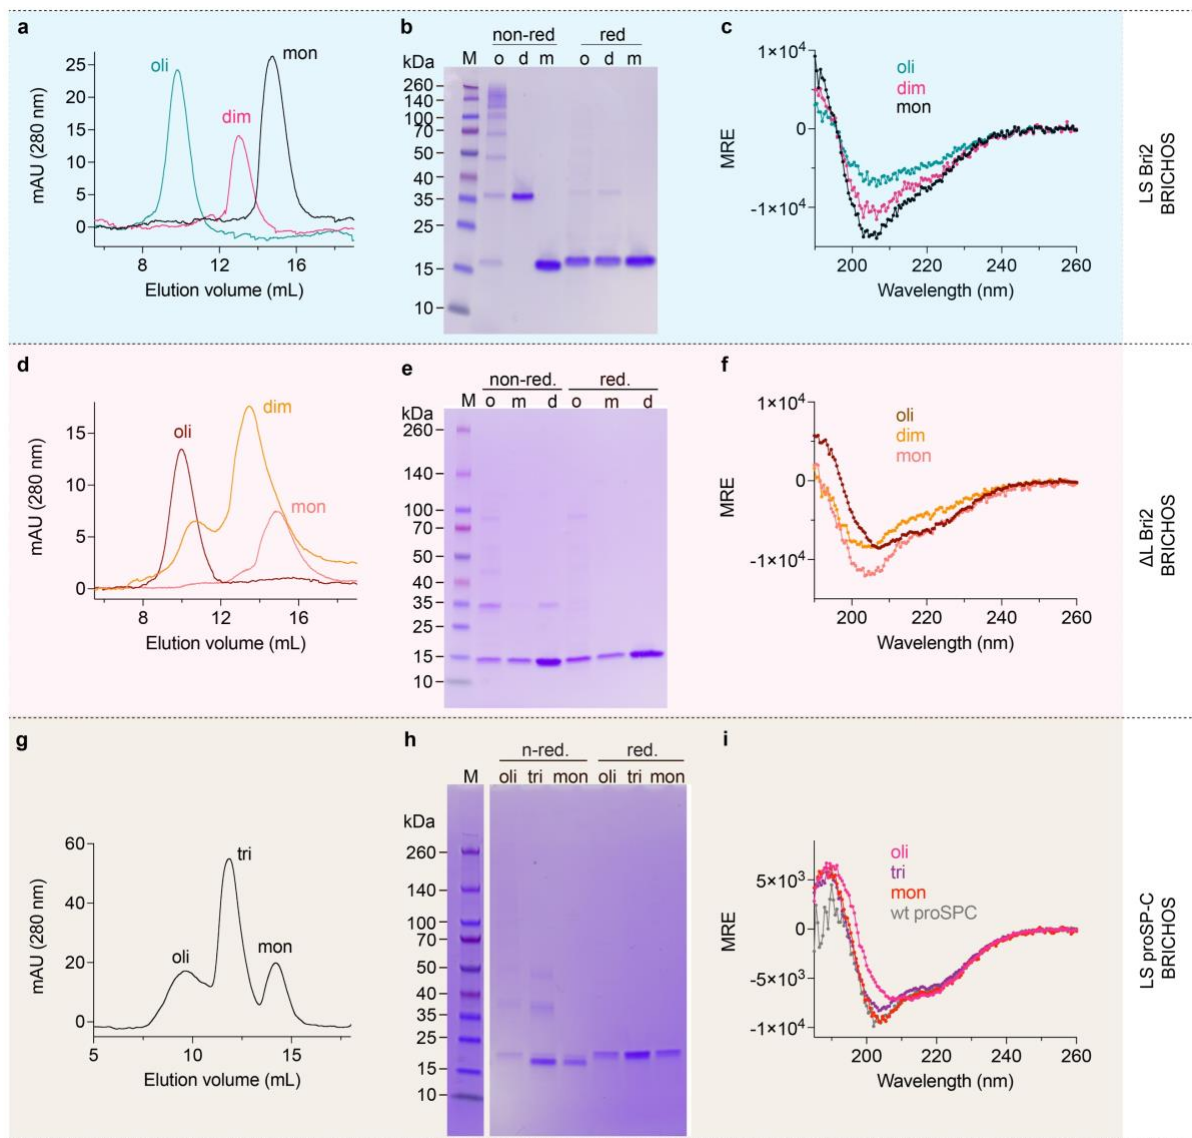

42

43 **Supplementary Fig. 2 | Properties of BRICHOS loop-swap variants.** (a) Size exclusion  
 44 chromatography (SEC), (b) SDS-PAGE, (c) CD spectra of LS Bri2 BRICHOS oligomer (oli,  
 45 o), dimer (dim, d) and monomer (mon, m). (d) SEC, (e) SDS-PAGE, (f) CD spectra of  $\Delta$ L  
 46 Bri2 BRICHOS oligomer (oli, o), dimer (dim, d) and monomer (mon, m). (g) SEC, (h) SDS-  
 47 PAGE (i) CD spectra of LS proSP-C BRICHOS oligomer (oli), trimer (tri) and monomer (mon)  
 48 and wt proSP-C BRICHOS. M: protein ladder.

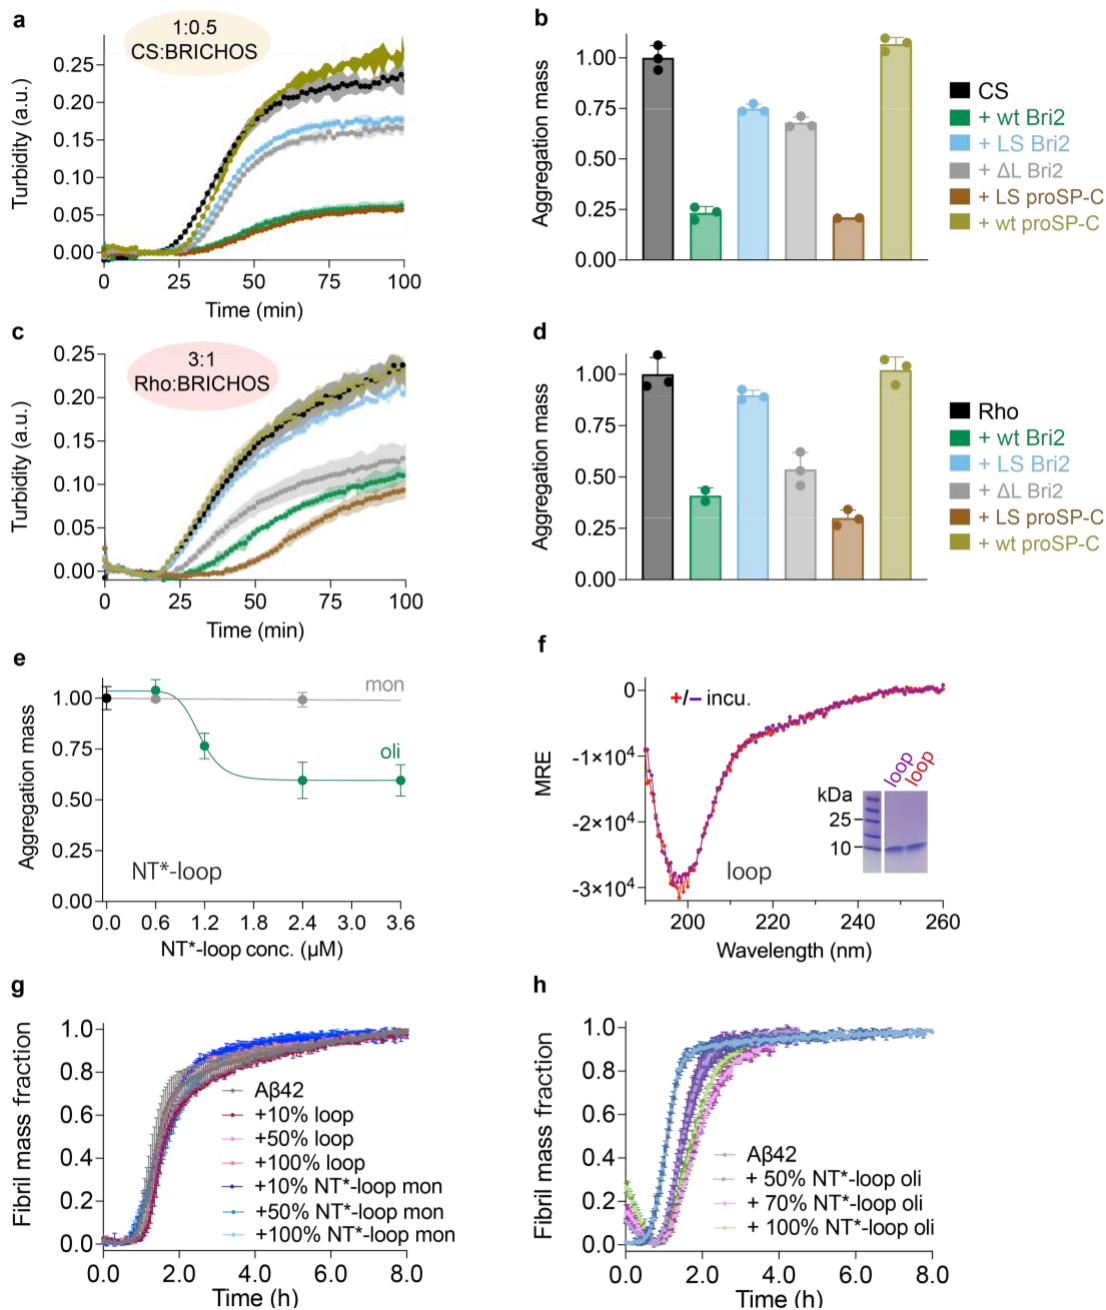

49

50 **Supplementary Fig. 3 | Ability of BRICHOS loop variants to suppress amorphous protein**

51 **aggregation.** (a) Aggregation traces of  $1.2 \mu\text{mol L}^{-1}$  CS at  $45^\circ\text{C}$  alone and with the different

52 loop variants at a molar ratio of 1:0.5 (CS: BRICHOS), color-coded as in (b). (b) Aggregation

53 mass determined from the areas under curves in (a). (c) Aggregation traces of  $3 \mu\text{mol L}^{-1}$  Rho

54 at  $45^\circ\text{C}$  alone and with the different loop variants at a molar ratio of 3:1 (Rho: BRICHOS),

55 color-coded as in (d). (d) Aggregation mass determined from the areas under curves in (c). (e)

56 Aggregation mass of  $1.2 \mu\text{mol L}^{-1}$  CS at  $45^\circ\text{C}$  in the presence or absence of NT\*-loop fusion

57 protein monomer (mon, linear fit) and oligomer (oli, sigmoidal fit). **(f)** CD spectra of the  
58 isolated loop peptide before and after overnight incubation at 37°C. The inset shows the SDS-  
59 PAGE analysis of the loop peptide with (right lane) and without (left lane) incubation. **(g and**  
60 **h)** Aggregation kinetics of 3  $\mu\text{mol L}^{-1}$  A $\beta$ 42 monomers monitored by ThT fluorescence in the  
61 absence or presence of different molar ratios of recombinant loop peptide, or NT\*-loop fusion  
62 protein monomer or oligomers. The data are presented as means  $\pm$  standard deviations.

63

64

65

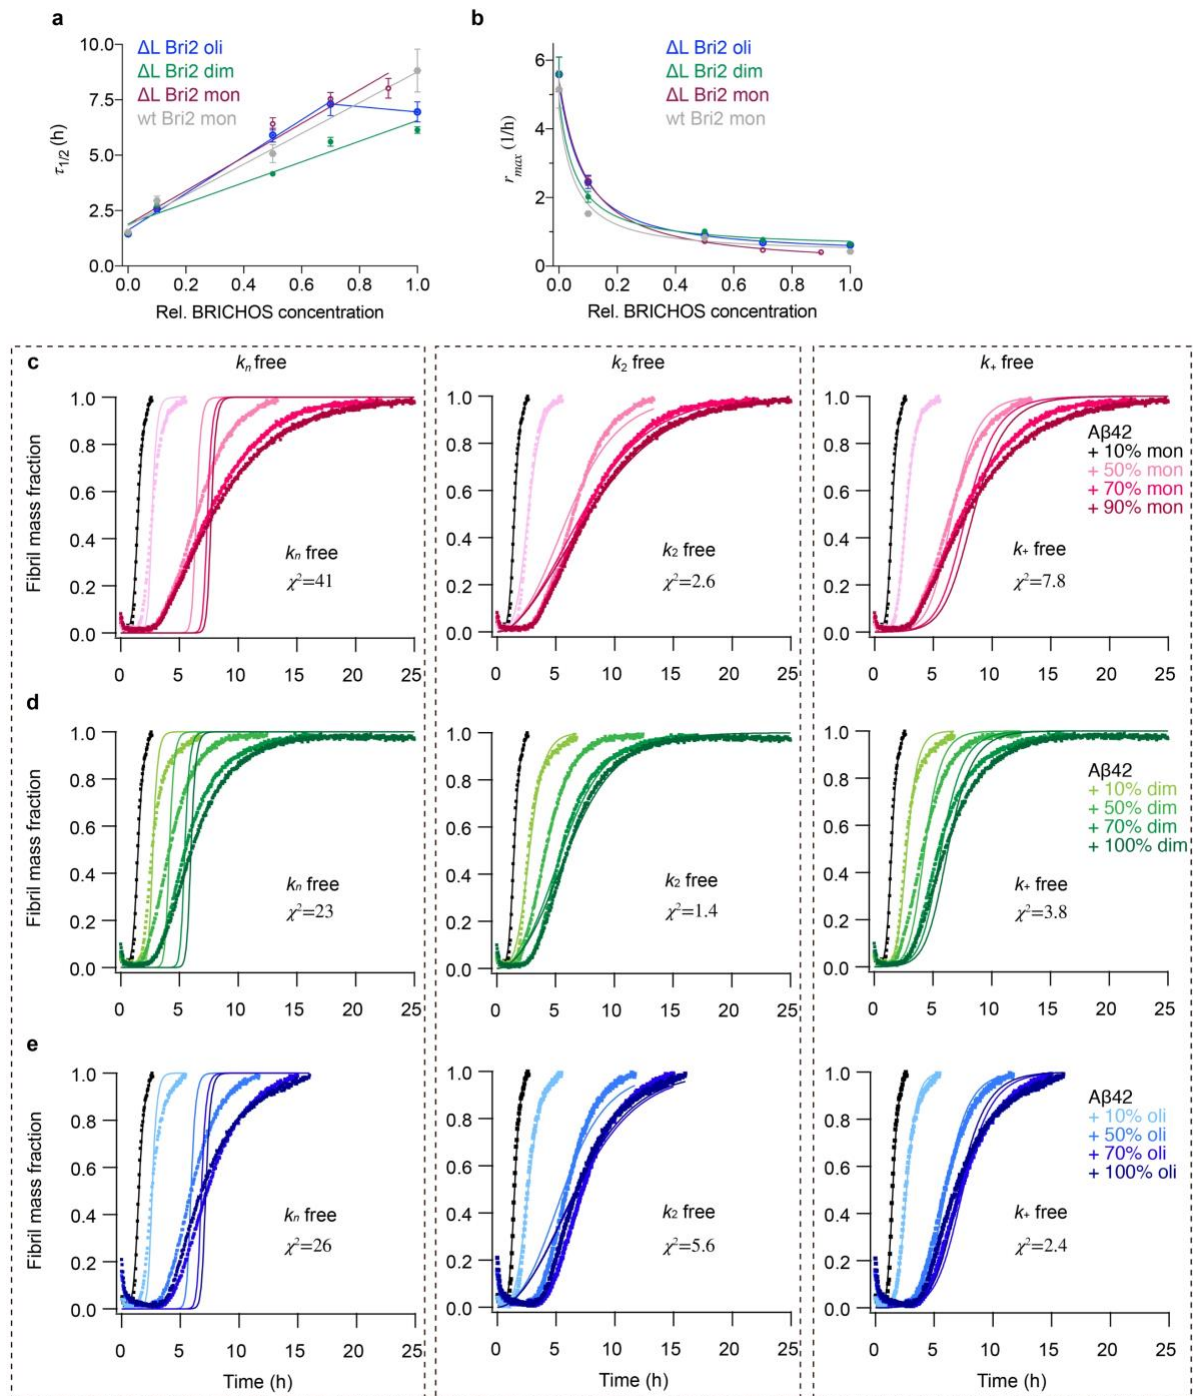

66

67 **Supplementary Fig. 4 |  $\Delta$ L Bri2 BRICHOS ability to inhibit A $\beta$ 42 fibril formation. (a)**

68 Values for  $\tau_{1/2}$  and (b)  $r_{max}$  extracted from the sigmoidal fits of A $\beta$ 42 aggregation traces in the

69 presence of different concentrations of  $\Delta$ L Bri2 BRICHOS oligomer (oli), dimer (dim),

70 monomer (mon) and wt Bri2 BRICHOS monomer monitored by ThT fluorescence. (c–e)

71 Aggregation kinetics of 3  $\mu$ mol L<sup>-1</sup> A $\beta$ 42 in the presence of  $\Delta$ L Bri2 BRICHOS monomer

72 (mon, c, red), dimer (dim, d, green) and oligomer (oli, e, blue) at different molar ratios. The



73 global fits (solid lines) of the aggregation traces (squares) were constrained such that only  
 74 one rate constant is the free fitting parameter, indicated in each panel.  $\chi^2$  values describe the  
 75 quality of the fits.

76

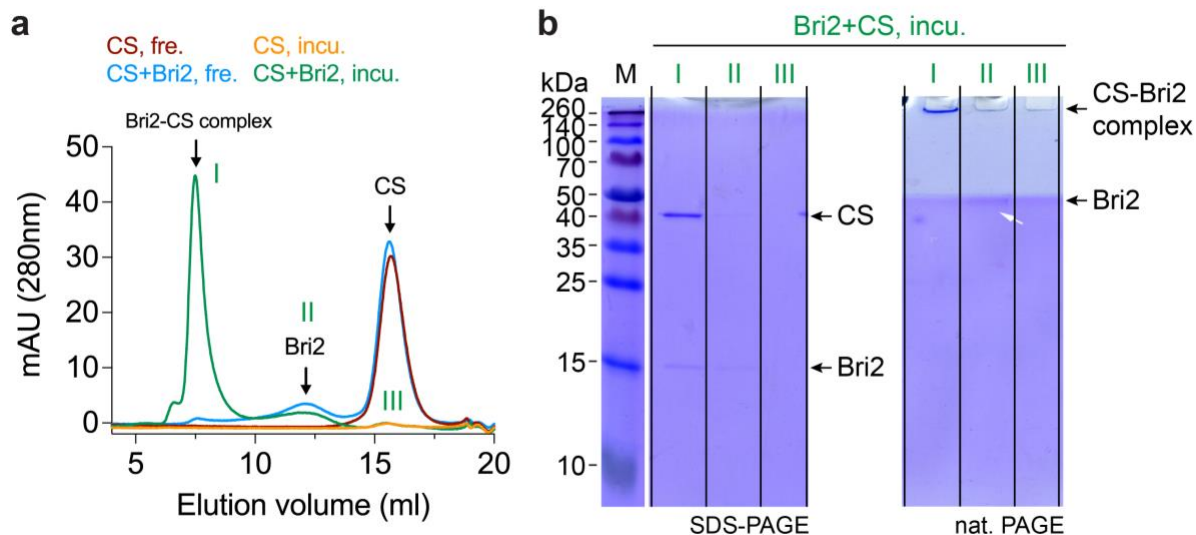

**c** negative staining images of Bri2-CS complex from peak I

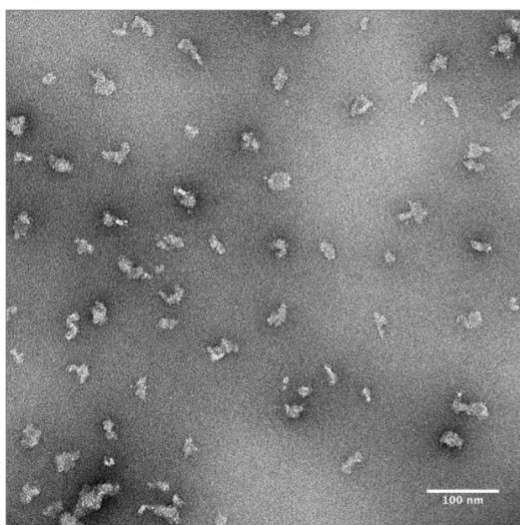

77

78 **Supplementary Fig. 5 | Rh Bri2 BRICHOS oligomer and monomer interactions with**  
 79 **thermo-unfolded CS and bis-ANS.** (a) SEC of fresh CS with and without rh Bri2 BRICHOS  
 80 oligomer (Bri2), and of CS incubated with and without rh Bri2 BRICHOS oligomer. I, II, and  
 81 III in green indicate fractions collected for CS incubated with rh Bri2 BRICHOS oligomer. (b)  
 82 SDS-PAGE and native PAGE of SEC-isolated CS incubated with rh Bri2 BRICHOS oligomer

83 from (a). M for protein marker. (c) Negative-staining EM micrograph of rh Bri2 BRICHOS  
 84 oligomer-CS complex present in fraction I in (a).

85

86

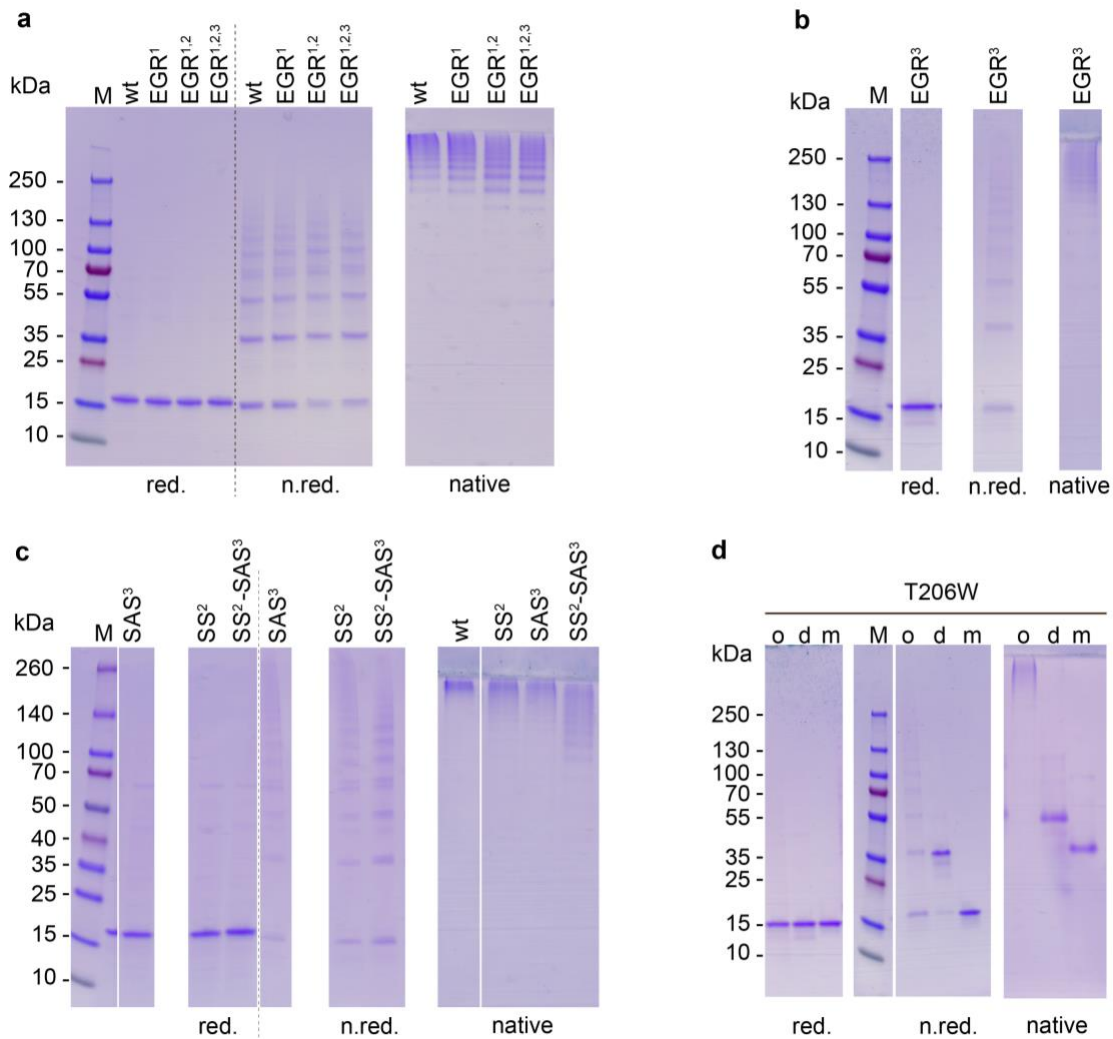

87

88 **Supplementary Fig. 6 | Characterisation of human Bri2 BRICHOS mutants. (a–d) SDS**

89 and native PAGE of oligomers of (a) Bri2 BRICHOS EGR<sup>1</sup>, EGR<sup>1,2</sup> and EGR<sup>1,2,3</sup>, (b) EGR<sup>3</sup>,

90 (c) SS<sup>2</sup>, SAS<sup>3</sup> and SS<sup>2</sup>-SAS<sup>33</sup>, and (d) oligomer (o), dimers (d), and monomers (m) of T206W

91 analyzed under reducing (red.) and non-reducing (n.red.) conditions M: protein ladder.



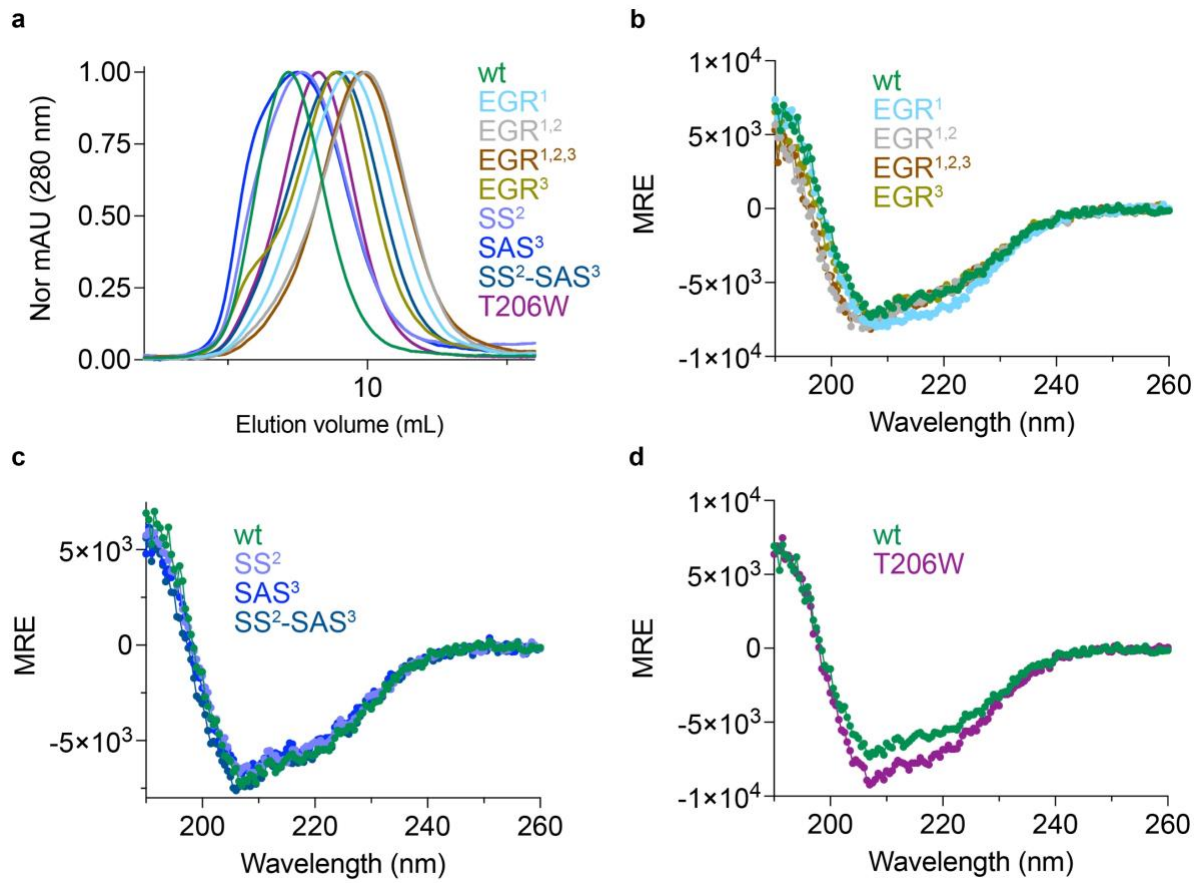

92

93 **Supplementary Fig. 7 | SEC and CD measurements of human Bri2 BRICHOS mutants.**

94 **(a)** SEC analysis of oligomers of wt Bri2 BRICHOS and corresponding mutants. **(b)** CD

95 spectra of wt Bri2 BRICHOS and indicated mutants. **(c)** CD spectra of wt Bri2 BRICHOS and

96 indicated mutants. **(d)** CD spectra of wt Bri2 BRICHOS and T206W mutant.

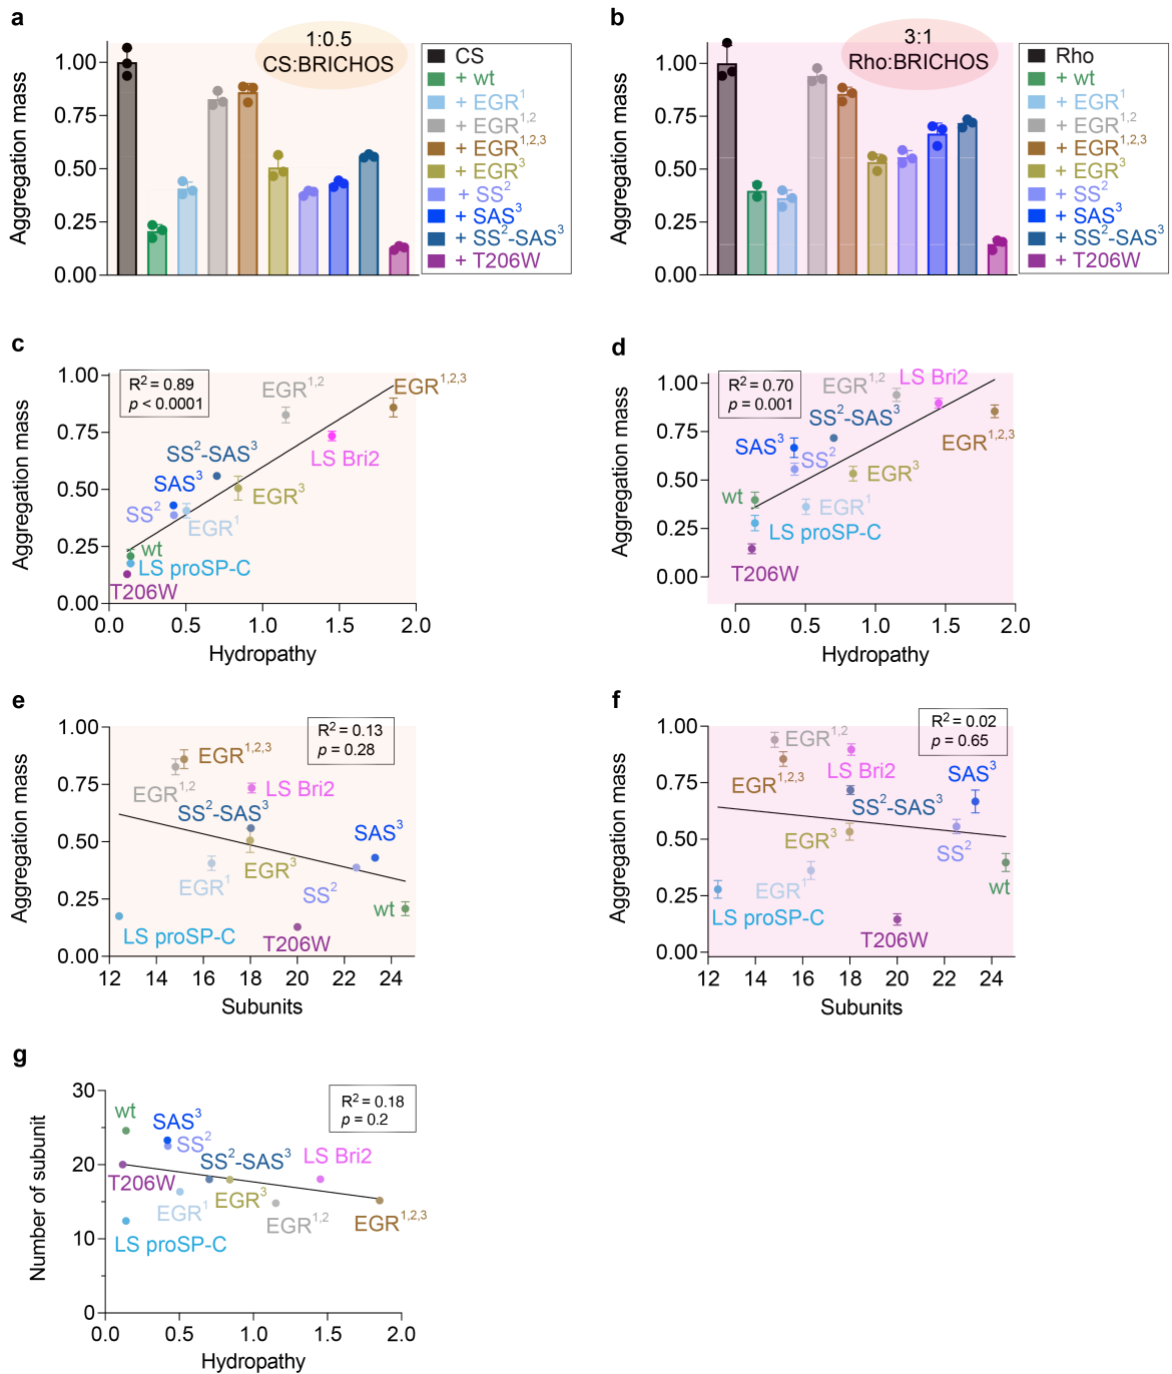

97

98 **Supplementary Fig. 8 | Ability of BRICHOS mutants to suppress amorphous protein**

99 **aggregation. (a)** Aggregation mass of  $1.2 \mu\text{mol L}^{-1}$  CS at  $45^\circ\text{C}$  in the presence or absence of

100 the indicated loop mutants at 1:0.5 (CS: BRICHOS) molar ratio. **(b)** Aggregation mass of 3

101  $\mu\text{mol L}^{-1}$  Rho at  $45^\circ\text{C}$  with and without the indicated loop mutants at a molar ratio of 3:1 (Rho:

102 BRICHOS). **(c)** Correlation analysis between the CS aggregation mass (data from **a**) and

103 hydropathy for each BRICHOS mutant. **(d)** Correlation analysis between the Rho aggregation

104 mass (data from **b**) and hydrophathy for each BRICHOS mutant. (**e**) Correlation analysis of the  
105 CS aggregation mass (data from **a**) and the number of constituent subunits for each BRICHOS  
106 mutant (data from **Supplementary Fig. 7a**). (**f**) Correlation analysis of the Rho aggregation  
107 mass (data from **b**) and the number of constituent subunits for each BRICHOS mutant (data  
108 from **Supplementary Fig. 7a**). (**g**) Correlation analysis of the number of constituent subunits  
109 for each BRICHOS mutant (data from **Supplementary Fig. 7a**) and hydrophathy for each  
110 BRICHOS mutant. The data are presented as means  $\pm$  standard deviations. For hydrophathy  
111 values (**c–d and g**), combined motifs 1–3 plus T206 or W206 for each specific BRICHOS  
112 mutant were considered, respectively. Panels with data for the same substrate/BRICHOS ratio  
113 have the same color.

114

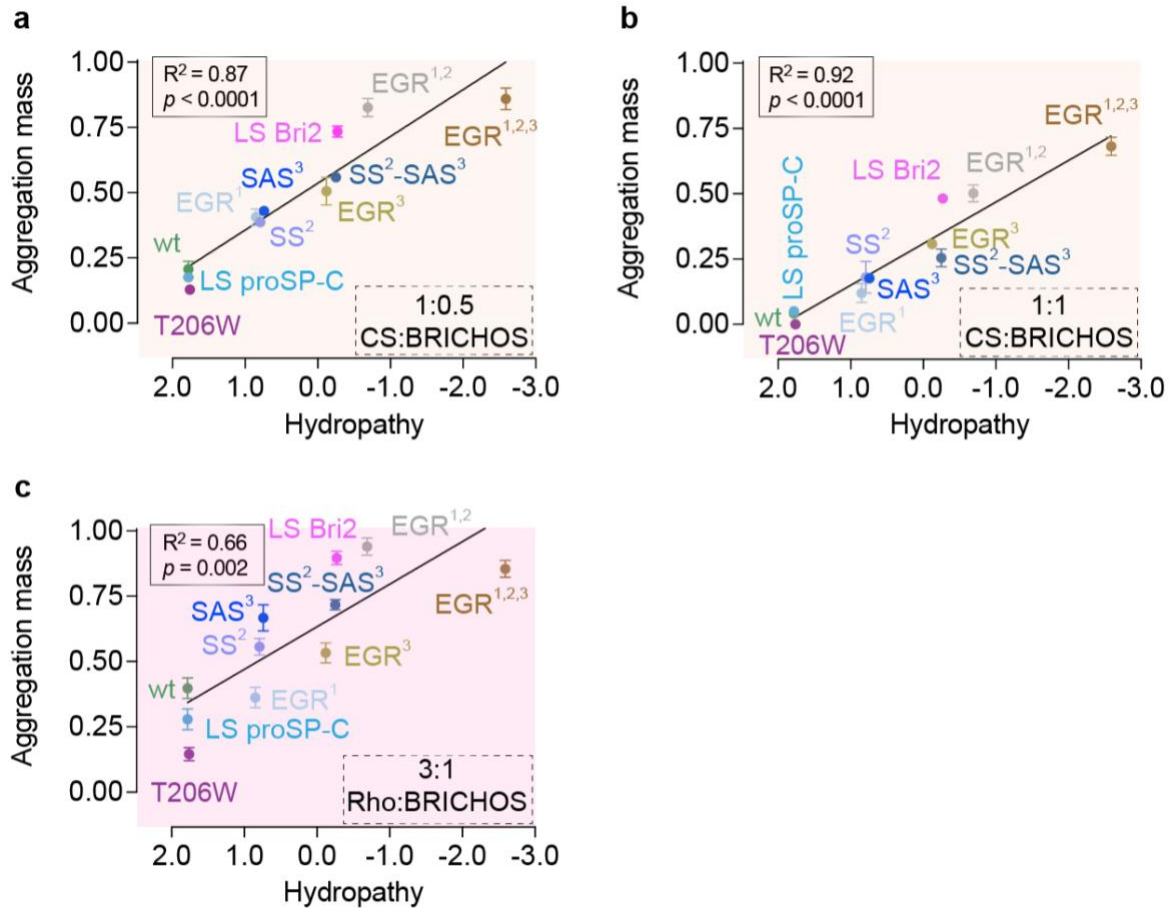

115

116 **Supplementary Fig. 9 | Correlation analysis of BRICHOS loop hydropathy and ability to**

117 **suppress amorphous protein aggregation.** Correlation analysis between the CS aggregation

118 mass at (a) CS:BRICHOS=1:0.5 (data from **Supplementary Fig. 8a**), (b) CS:BRICHOS=1:1

119 (data from **Fig. 3c**), or (c) Rho aggregation mass at Rho:BRICHOS=3:1 (data from

120 **Supplementary Fig. 8b**) and hydropathy calculated using the Kyte-Doolittle scale<sup>1</sup> for motifs

121 1-3 and Thr206 or Trp206 for each BRICHOS loop-swap variant or mutant.

122

123

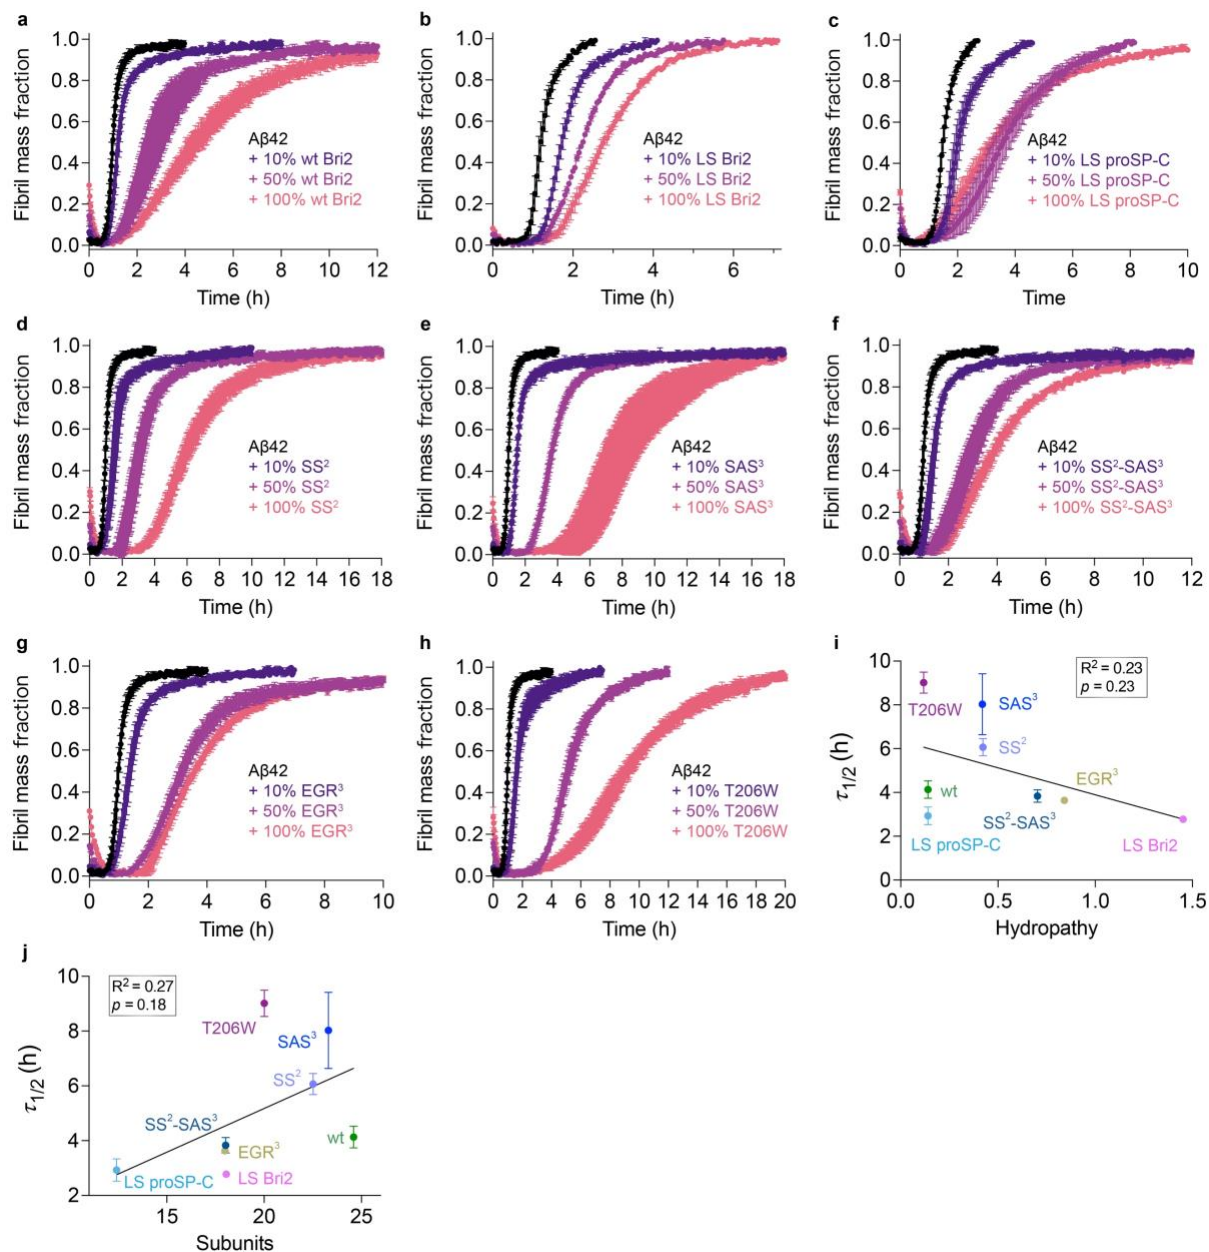

124

125 **Supplementary Fig. 10 | Anti-amyloid fibril formation activity of the Bri2 BRICHOS**

126 **mutants.** Aggregation kinetics of  $3 \mu\text{mol L}^{-1}$  Aβ42 monomers in the absence or presence of

127 oligomers of (a) wt Bri2 BRICHOS, (b) LS Bri2 BRICHOS, (c) LS proSP-C BRICHOS, (d)

128 SS<sup>2</sup>, (e) SAS<sup>3</sup>, (f) SS<sup>2</sup>-SAS<sup>3</sup>, (g) EGR<sup>3</sup>, and (h) T206W mutants at 10%, 50% and 100% molar

129 ratios monitored by ThT fluorescence. (i,j) Correlation between  $\tau_{1/2}$  extracted by sigmoidal

130 fitting from traces at 100% molar ratio in (a–h) and (i) hydropathy of the combined motifs 1–

131 3 plus T206 or W206 for each variant, and (j) the number of constituent subunits for each

132 BRICHOS mutant (data from **Supplementary Fig. 7a**). The data are presented as means  $\pm$   
 133 standard deviations.

134

135

136

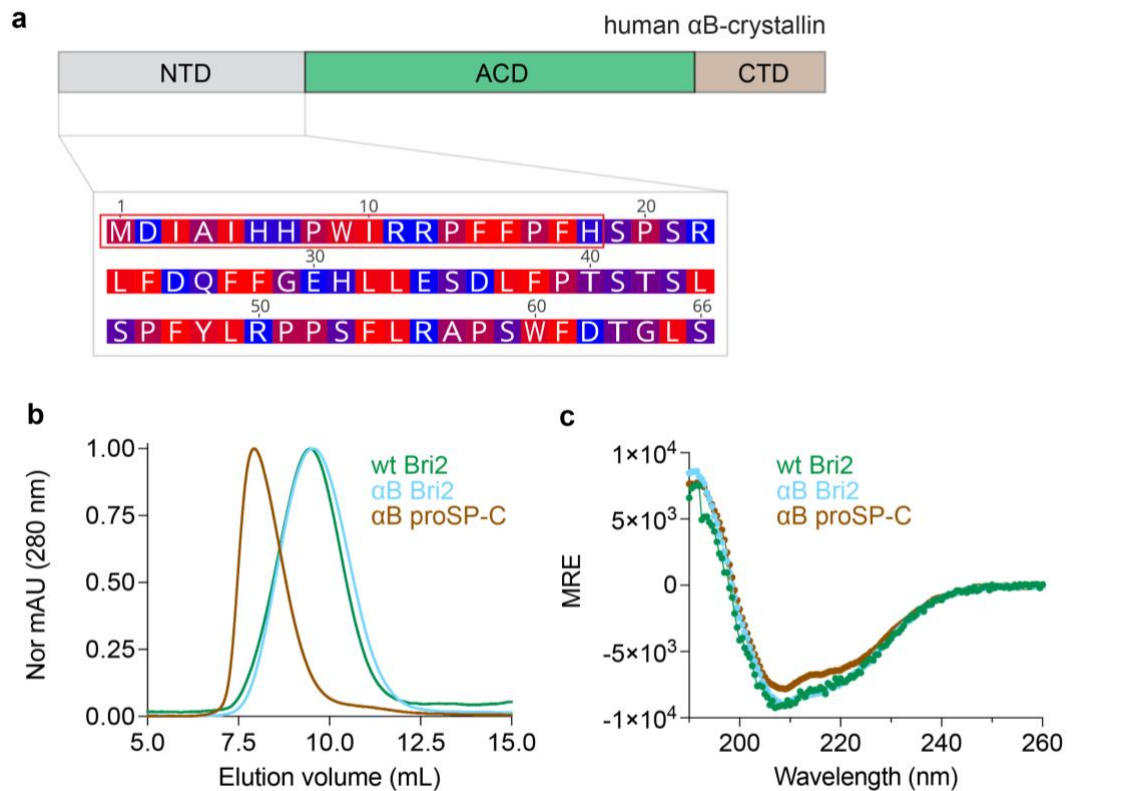

137

138 **Supplementary Fig. 11 | Properties of  $\alpha$ B BRICHOS chimeras.** (a) Architecture of human  
 139  $\alpha$ B-crystallin (NCBI accession number: P02511). The N-terminal domain (NTD, amino acid  
 140 residues 1–66) is color-coded from blue to red according to increasing hydrophobicity. The N-  
 141 terminal 18 residues that replaced the core loop regions in  $\alpha$ B-Bri2 or  $\alpha$ B-proSP-C BRICHOS  
 142 chimeras are boxed. ACD,  $\alpha$  crystallin domain. CTD, C-terminal domain. (b) SEC analysis of  
 143 oligomers of wt Bri2,  $\alpha$ B Bri2 and  $\alpha$ B proSP-C BRICHOS chimeras. (b) CD spectra of  
 144 oligomers of wt Bri2,  $\alpha$ B Bri2 and  $\alpha$ B proSP-C BRICHOS chimeras.



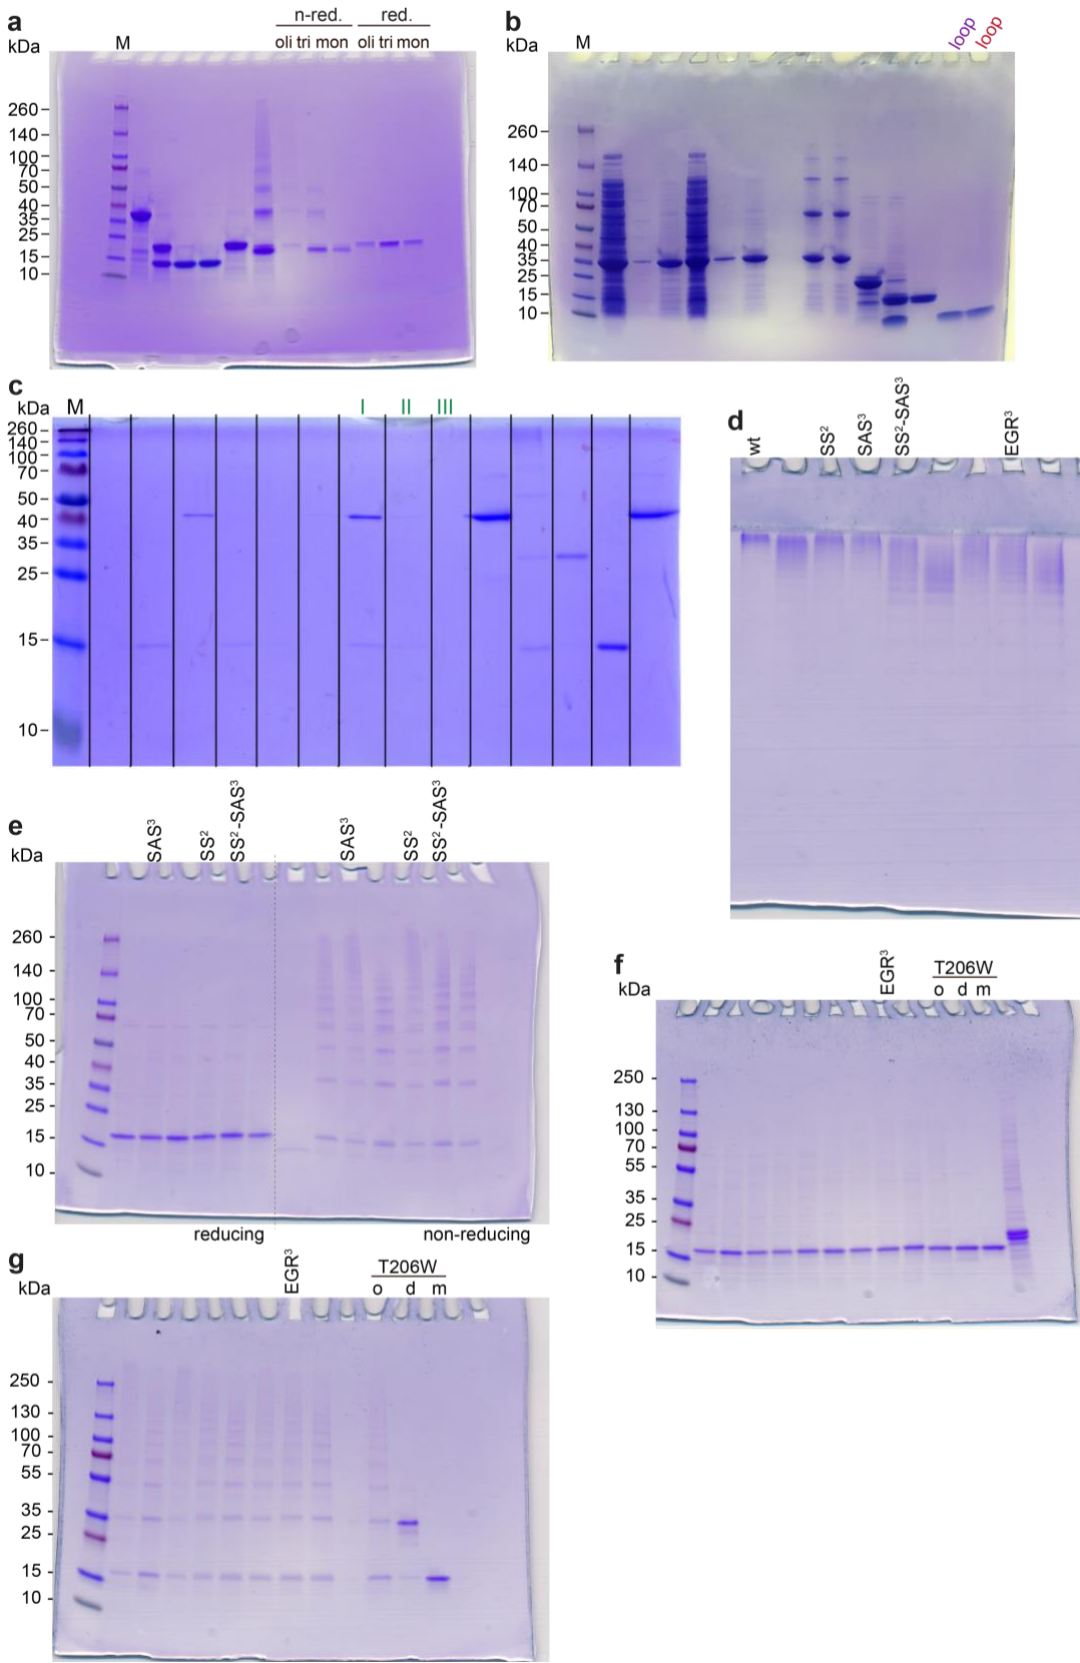

145

146 **Supplementary Fig. 12 | Uncropped PAGE gels. (a) SDS-PAGE of Supplementary Figure**

147 **2h. (b)** SDS-PAGE of **Supplementary Figure 3f. (c)** SDS-PAGE of **Supplementary Figure**  
148 **5b. (d)** Native PAGE of **Supplementary Figure 6b** and **c. (e)** SDS-PAGE of **Supplementary**  
149 **Figure 6c. (f)** SDS-PAGE of **Supplementary Figure 6b** and **d. (g)** SDS-PAGE of  
150 **Supplementary Figure 6b** and **d.**

151

152 **Supplementary Reference**

153 1 Kyte, J. & Doolittle, R. F. A simple method for displaying the hydrophobic character of  
154 a protein. *J. Mol. Biol.* **157**, 105-132 (1982).

155
