# Supplementary material for: Short hydrophobic loop motifs in BRICHOS domains determine chaperone activity against amorphous protein aggregation but not against amyloid formation
Source: PubMed Central journal article supplement (PMC10167226; doi:10.1038/s42003-023-04883-2), 2023-05-08
Supplement: 42003_2023_4883_MOESM2_ESM.pdf [file 42003_2023_4883_MOESM2_ESM.pdf]

## Description of Additional Supplementary Files

**File name:** Supplementary Data

**Description:** Raw data for figures 2b and 3c.
